# Supplementary material for: Exploring the Genomic Architectures of Health, Physical Traits and Antisocial Behavioral Outcomes: A Brief Report
Source: Front Psychiatry. 2020 Jun 25;11:539. doi: 10.3389/fpsyt.2020.00539 (PMC7330713; doi:10.3389/fpsyt.2020.00539)
Supplement: Supplementary file 1 [file Table_1.xlsx]

## Sheet: Table S1 - Genetic correlations
Phenotype	rg	SE	P	SNP h2
Hand grip strength (left)	0.013	0.082	0.879	0.104
Hand grip strength (right)	0.033	0.083	0.692	0.103
Waist circumference	0.317	0.104	0.002	0.201
Hip circumference	0.259	0.097	0.008	0.216
Standing height	0.005	0.069	0.948	0.447
Heel bone mineral density (BMD) T-score_ automated	-0.021	0.086	0.805	0.296
Pulse rate_ automated reading	0.033	0.085	0.694	0.151
Number of self-reported cancers	0.022	0.25	0.93	0.007
Number of self-reported non-cancer illnesses	0.323	0.123	0.009	0.063
Number of operations_ self-reported	0.33	0.144	0.022	0.038
Number of treatments/medications taken	0.408	0.128	0.002	0.061
Townsend deprivation index at recruitment	0.453	0.149	0.002	0.034
Number of incorrect matches in round	0.224	0.117	0.056	0.054
Length of working week for main job	0.345	0.2	0.085	0.02
Frequency of travelling from home to job workplace	0.314	0.197	0.111	0.022
Distance between home and job workplace	-0.208	0.276	0.45	0.012
Job involves mainly walking or standing	0.512	0.157	0.001	0.078
Job involves heavy manual or physical work	0.483	0.149	0.001	0.084
Job involves shift work	0.596	0.194	0.002	0.029
Age completed full time education	-0.552	0.172	0.001	0.085
Number of days/week walked 10+ minutes	0.134	0.106	0.206	0.043
Duration of walks	0.232	0.119	0.05	0.045
Number of days/week of moderate physical activity 10+ minutes	0.277	0.126	0.029	0.042
Duration of moderate activity	0.504	0.185	0.007	0.033
Number of days/week of vigorous physical activity 10+ minutes	0.33	0.152	0.03	0.037
Duration of vigorous activity	0.219	0.167	0.192	0.035
Usual walking pace	-0.17	0.105	0.108	0.078
Frequency of stair climbing in last 4 weeks	-0.153	0.125	0.221	0.036
Frequency of walking for pleasure in last 4 weeks	0.516	0.182	0.005	0.034
Duration walking for pleasure	-0.119	0.143	0.405	0.025
Duration of strenuous sports	0.161	0.32	0.614	0.033
Frequency of light DIY in last 4 weeks	0.428	0.205	0.037	0.022
Duration of light DIY	0.225	0.171	0.189	0.036
Time spent watching television (TV)	0.436	0.13	0.001	0.101
Time spent using computer	-0.176	0.101	0.081	0.096
Time spent driving	-0.016	0.136	0.909	0.043
Drive faster than motorway speed limit	0.011	0.112	0.92	0.057
Sleep duration	-0.127	0.106	0.23	0.073
Getting up in morning	0.15	0.107	0.159	0.069
Morning/evening person (chronotype)	-0.096	0.088	0.275	0.117
Nap during day	0.144	0.11	0.192	0.08
Sleeplessness / insomnia	0.322	0.124	0.009	0.063
Snoring	0.01	0.107	0.927	0.06
Daytime dozing / sleeping (narcolepsy)	0.037	0.115	0.749	0.048
Current tobacco smoking	0.564	0.164	0.001	0.056
Past tobacco smoking	-0.358	0.127	0.005	0.093
Smoking/smokers in household	0.748	0.276	0.007	0.01
Exposure to tobacco smoke at home	0.587	0.206	0.004	0.013
Exposure to tobacco smoke outside home	0.521	0.179	0.004	0.032
Alcohol intake frequency,	0.26	0.104	0.013	0.083
Average weekly red wine intake	-0.111	0.111	0.319	0.057
Average weekly champagne plus white wine intake	-0.323	0.173	0.062	0.031
Average weekly beer plus cider intake	0.284	0.123	0.021	0.054
Average weekly spirits intake	0.221	0.146	0.131	0.031
Average weekly fortified wine intake	-0.321	0.207	0.121	0.013
Alcohol usually taken with meals	-0.247	0.12	0.04	0.112
Alcohol intake versus 10 years previously	0.341	0.137	0.013	0.035
Breastfed as a baby	-0.143	0.175	0.415	0.025
Comparative body size at age 10	-0.084	0.078	0.277	0.147
Comparative height size at age 10	0.043	0.076	0.57	0.242
Adopted as a child	0.34	0.279	0.223	0.006
Maternal smoking around birth	0.399	0.138	0.004	0.051
Father still alive	0.062	0.267	0.817	0.006
Fathers age at death	-0.429	0.176	0.015	0.034
Number of full brothers	0.548	0.204	0.007	0.019
Number of full sisters	0.459	0.203	0.024	0.02
Mood swings	0.482	0.14	0.001	0.072
Miserableness	0.421	0.132	0.001	0.065
Irritability	0.521	0.148	0.0004	0.07
Sensitivity / hurt feelings	0.292	0.125	0.019	0.065
Fed-up feelings	0.465	0.13	0.0003	0.071
Nervous feelings	0.121	0.111	0.276	0.067
Worrier / anxious feelings	0.092	0.108	0.394	0.081
Tense / highly strung	0.463	0.145	0.001	0.058
Worry too long after embarrassment	0.005	0.1	0.958	0.067
Suffer from nerves	0.301	0.124	0.015	0.047
Loneliness_ isolation	0.509	0.155	0.001	0.038
Guilty feelings	0.449	0.145	0.002	0.052
Risk taking	0.432	0.143	0.003	0.057
Frequency of depressed mood in last 2 weeks	0.503	0.153	0.001	0.044
Frequency of unenthusiasm / disinterest in last 2 weeks	0.483	0.151	0.001	0.04
Frequency of tenseness / restlessness in last 2 weeks	0.544	0.158	0.001	0.043
Frequency of tiredness / lethargy in last 2 weeks	0.435	0.139	0.002	0.059
Seen doctor (GP) for nerves_ anxiety_ tension or depression	0.444	0.137	0.001	0.062
Seen a psychiatrist for nerves_ anxiety_ tension or depression	0.519	0.156	0.001	0.031
Overall health rating	0.435	0.127	0.001	0.1
Long-standing illness_ disability or infirmity	0.461	0.143	0.001	0.051
Wears glasses or contact lenses	-0.189	0.163	0.246	0.016
Other eye problems	0.564	0.222	0.011	0.01
Hearing difficulty/problems with background noise	0.314	0.123	0.011	0.053
Falls in the last year	0.328	0.152	0.031	0.033
Weight change compared with 1 year ago	0.373	0.242	0.124	0.009
Wheeze or whistling in the chest in last year	0.585	0.157	0.0002	0.061
Chest pain or discomfort	0.638	0.195	0.001	0.032
Ever had bowel cancer screening	-0.076	0.189	0.687	0.013
Most recent bowel cancer screening	0.034	0.364	0.925	0.012
Ever had prostate specific antigen (PSA) test	-0.378	0.188	0.044	0.036
Relative age of first facial hair	0.116	0.105	0.271	0.116
Relative age voice broke	0.098	0.119	0.41	0.074
Number of children fathered	0.236	0.171	0.168	0.033
Had major operations	0.37	0.195	0.057	0.025
Diabetes diagnosed by doctor	0.199	0.123	0.105	0.043
Cancer diagnosed by doctor	0.133	0.253	0.598	0.007
Fractured/broken bones in last 5 years	0.012	0.154	0.94	0.018
Other serious medical condition/disability diagnosed by doctor	0.225	0.14	0.108	0.025
Taking other prescription medications	0.492	0.146	0.001	0.044
Frequency of heavy DIY in last 4 weeks	0.123	0.236	0.603	0.02
Duration of heavy DIY	0.332	0.2	0.096	0.032
Light smokers_ at least 100 smokes in lifetime	0.353	0.166	0.034	0.076
Age when periods started (menarche)	0.027	0.078	0.729	0.209
Had menopause	-0.017	0.226	0.939	0.019
Number of live births	0.169	0.121	0.163	0.063
Birth weight of first child	-0.12	0.11	0.277	0.108
Age at first live birth	-0.545	0.168	0.001	0.168
Age at last live birth	-0.453	0.172	0.008	0.087
Ever had stillbirth_ spontaneous miscarriage or termination	0.337	0.206	0.102	0.023
Ever taken oral contraceptive pill	0.141	0.201	0.483	0.019
Age started oral contraceptive pill	-0.408	0.164	0.013	0.049
Ever used hormone-replacement therapy (HRT)	0.442	0.181	0.015	0.04
Bilateral oophorectomy (both ovaries removed)	0.628	0.239	0.009	0.024
Had other major operations	0.142	0.165	0.391	0.03
Number of cigarettes previously smoked daily	0.199	0.141	0.159	0.096
Ever stopped smoking for 6+ months	0.381	0.284	0.18	0.019
Number of unsuccessful stop-smoking attempts	0.192	0.199	0.336	0.049
Started insulin within one year diagnosis of diabetes	-0.588	0.274	0.032	0.188
Fracture resulting from simple fall	-0.701	0.321	0.029	0.061
Forced vital capacity (FVC)	-0.04	0.086	0.644	0.171
Forced expiratory volume in 1-second (FEV1)	-0.073	0.086	0.397	0.149
Peak expiratory flow (PEF)	-0.05	0.095	0.598	0.091
Used an inhaler for chest within last hour	0.49	0.336	0.144	0.004
Hearing aid user	0.264	0.213	0.216	0.018
Neck/shoulder pain for 3+ months	0.609	0.315	0.053	0.02
Number of cigarettes currently smoked daily (current cigarette smokers)	0.484	0.255	0.058	0.105
Time from waking to first cigarette	-0.28	0.237	0.237	0.088
Difficulty not smoking for 1 day	0.526	0.28	0.06	0.11
Mothers age at death	-0.265	0.187	0.156	0.025
Back pain for 3+ months	0.532	0.218	0.014	0.042
Ever had hysterectomy (womb removed)	0.662	0.254	0.009	0.021
Chest pain or discomfort walking normally	0.462	0.2	0.021	0.074
Frequency of other exercises in last 4 weeks	0.339	0.22	0.123	0.022
Duration of other exercises	0.359	0.226	0.111	0.019
Length of menstrual cycle	-0.187	0.22	0.396	0.106
Former alcohol drinker	-0.077	0.225	0.732	0.122
Knee pain for 3+ months	0.23	0.27	0.396	0.025
Headaches for 3+ months	0.247	0.203	0.223	0.056
Number of pregnancy terminations	0.484	0.232	0.037	0.065
Diastolic blood pressure_ automated reading	0.047	0.096	0.622	0.135
Systolic blood pressure_ automated reading	-0.074	0.085	0.387	0.127
Heel bone mineral density (BMD) T-score_ automated (left)	-0.078	0.092	0.398	0.304
Heel bone mineral density (BMD) T-score_ automated (right)	-0.048	0.091	0.597	0.307
Pulse rate	0.041	0.108	0.701	0.128
Pulse wave reflection index	-0.153	0.161	0.342	0.053
Pulse wave peak to peak time	0.134	0.178	0.452	0.04
Non-accidental death in close genetic family	-0.053	0.239	0.825	0.02
Happiness	0.113	0.155	0.468	0.061
Work/job satisfaction	0.028	0.177	0.874	0.049
Health satisfaction	0.525	0.169	0.002	0.083
Family relationship satisfaction	0.445	0.171	0.009	0.055
Friendships satisfaction	0.167	0.156	0.282	0.058
Financial situation satisfaction	0.54	0.191	0.005	0.058
Ever depressed for a whole week	0.693	0.206	0.001	0.062
Number of depression episodes	0.992	0.404	0.014	0.031
Ever unenthusiastic/disinterested for a whole week	0.631	0.182	0.001	0.057
Ever manic/hyper for 2 days	NA	NA	NA	NA
Ever highly irritable/argumentative for 2 days	0.815	0.235	0.001	0.053
Shortness of breath walking on level ground	0.379	0.187	0.043	0.05
Leg pain on walking	0.532	0.189	0.005	0.059
Noisy workplace	0.638	0.198	0.001	0.062
Loud music exposure frequency	0.306	0.232	0.188	0.027
Number of older siblings	0.185	0.392	0.637	0.009
Average weekly intake of other alcoholic drinks	0.823	0.466	0.077	0.009
Maximum workload during fitness test	-0.24	0.21	0.253	0.046
Maximum heart rate during fitness test	-0.162	0.215	0.451	0.07
Target heart rate achieved	-0.264	0.271	0.33	0.032
Number of trend entries	-0.225	0.281	0.422	0.033
Duration of fitness test	-0.146	0.324	0.653	0.024
Sitting height	0.023	0.075	0.755	0.322
Fluid intelligence score	-0.41	0.131	0.002	0.236
Prospective memory result	0.38	0.176	0.031	0.058
Birth weight	-0.037	0.098	0.707	0.105
Mean time to correctly identify matches	0.12	0.106	0.26	0.074
Neuroticism score	0.351	0.115	0.002	0.121
Forced expiratory volume in 1-second (FEV1)_ Best measure	-0.04	0.085	0.64	0.166
Forced vital capacity (FVC)_ Best measure	-0.038	0.087	0.665	0.19
Reproduciblity of spirometry measurement using ERS/ATS criteria	0.527	0.245	0.032	0.014
Forced expiratory volume in 1-second (FEV1)_ predicted	0.098	0.102	0.337	0.167
Forced expiratory volume in 1-second (FEV1)_ predicted percentage	-0.079	0.098	0.42	0.209
Ever smoked	0.321	0.127	0.011	0.077
Pack years of smoking PREVIEW ONLY	0.609	0.177	0.001	0.11
Pack years adult smoking as proportion of life span exposed to smoking	0.611	0.171	0.0004	0.127
Body mass index (BMI)	0.307	0.106	0.004	0.25
Weight	0.284	0.097	0.004	0.267
Pulse wave Arterial Stiffness index	-0.085	0.175	0.626	0.04
Doctor diagnosed hayfever or allergic rhinitis	0.282	0.163	0.084	0.081
Doctor diagnosed asthma	0.168	0.156	0.28	0.074
Cough on most days	0.423	0.232	0.068	0.049
Bring up phlegm/sputum/mucus on most days	0.319	0.255	0.212	0.026
Body fat percentage	0.248	0.096	0.01	0.217
Whole body fat mass	0.284	0.099	0.004	0.237
Whole body fat-free mass	0.22	0.085	0.01	0.289
Whole body water mass	0.222	0.085	0.009	0.289
Basal metabolic rate	0.244	0.088	0.006	0.285
Impedance of whole body	-0.246	0.098	0.012	0.259
Impedance of leg (right)	-0.19	0.091	0.036	0.242
Impedance of leg (left)	-0.21	0.095	0.027	0.242
Impedance of arm (right)	-0.214	0.092	0.02	0.238
Impedance of arm (left)	-0.236	0.096	0.014	0.233
Leg fat percentage (right)	0.284	0.101	0.005	0.21
Leg fat mass (right)	0.314	0.104	0.003	0.234
Leg fat-free mass (right)	0.238	0.09	0.009	0.265
Leg predicted mass (right)	0.237	0.09	0.009	0.265
Leg fat percentage (left)	0.277	0.099	0.005	0.21
Leg fat mass (left)	0.308	0.102	0.002	0.235
Leg fat-free mass (left)	0.255	0.094	0.007	0.267
Leg predicted mass (left)	0.253	0.094	0.007	0.267
Arm fat percentage (right)	0.245	0.097	0.012	0.215
Arm fat mass (right)	0.274	0.099	0.006	0.232
Arm fat-free mass (right)	0.229	0.085	0.007	0.267
Arm predicted mass (right)	0.229	0.085	0.007	0.266
Arm fat percentage (left)	0.248	0.098	0.011	0.219
Arm fat mass (left)	0.279	0.1	0.005	0.233
Arm fat-free mass (left)	0.227	0.085	0.008	0.266
Arm predicted mass (left)	0.221	0.085	0.009	0.265
Trunk fat percentage	0.236	0.096	0.014	0.206
Trunk fat mass	0.265	0.097	0.006	0.232
Trunk fat-free mass	0.191	0.08	0.017	0.285
Trunk predicted mass	0.188	0.08	0.019	0.284
Creatinine (enzymatic) in urine	0.28	0.109	0.01	0.066
Potassium in urine	0.106	0.122	0.388	0.043
Sodium in urine	0.179	0.101	0.075	0.072
No-wear time bias adjusted acceleration standard deviation	-0.12	0.143	0.404	0.091
Handedness (chirality/laterality): Left-handed	-0.211	0.231	0.361	0.01
Handedness (chirality/laterality): Use both right and left hands equally	0.115	0.285	0.687	0.005
Cancer code_ self-reported: lung cancer	0.306	0.773	0.693	0.001
Cancer code_ self-reported: breast cancer	-0.367	0.23	0.111	0.009
Cancer code_ self-reported: small intestine/small bowel cancer	NA	NA	NA	NA
Cancer code_ self-reported: prostate cancer	-0.189	0.262	0.472	0.006
Cancer code_ self-reported: malignant melanoma	-0.057	0.26	0.826	0.005
Cancer code_ self-reported: basal cell carcinoma	-0.282	0.188	0.133	0.011
Cancer code_ self-reported: squamous cell carcinoma	-0.242	0.436	0.579	0.002
Non-cancer illness code_ self-reported: hypertension	0.094	0.093	0.309	0.115
Non-cancer illness code_ self-reported: angina	0.262	0.153	0.088	0.021
Non-cancer illness code_ self-reported: heart attack/myocardial infarction	0.181	0.142	0.203	0.019
Non-cancer illness code_ self-reported: pulmonary embolism +/- dvt	0.114	0.25	0.647	0.005
Non-cancer illness code_ self-reported: deep venous thrombosis (dvt)	0.082	0.199	0.68	0.012
Non-cancer illness code_ self-reported: asthma	0.226	0.111	0.041	0.06
Non-cancer illness code_ self-reported: chronic obstructive airways disease/copd	0.925	0.385	0.016	0.005
Non-cancer illness code_ self-reported: emphysema/chronic bronchitis	0.23	0.209	0.271	0.01
Non-cancer illness code_ self-reported: sleep apnoea	0.283	0.338	0.403	0.004
Non-cancer illness code_ self-reported: gastro-oesophageal reflux (gord) / gastric reflux	0.204	0.226	0.365	0.011
Non-cancer illness code_ self-reported: cholelithiasis/gall stones	0.187	0.236	0.429	0.008
Non-cancer illness code_ self-reported: kidney stone/ureter stone/bladder stone	0.317	0.236	0.179	0.009
Non-cancer illness code_ self-reported: bladder problem (not cancer)	-0.155	0.339	0.647	0.003
Non-cancer illness code_ self-reported: diabetes	0.174	0.134	0.193	0.035
Non-cancer illness code_ self-reported: type 2 diabetes	0.122	0.256	0.634	0.006
Non-cancer illness code_ self-reported: hyperthyroidism/thyrotoxicosis	-0.471	0.253	0.063	0.009
Non-cancer illness code_ self-reported: hypothyroidism/myxoedema	0.12	0.109	0.27	0.051
Non-cancer illness code_ self-reported: migraine	0.062	0.155	0.689	0.016
Non-cancer illness code_ self-reported: glaucoma	-0.069	0.178	0.697	0.011
Non-cancer illness code_ self-reported: retinal detachment	0.517	0.402	0.199	0.003
Non-cancer illness code_ self-reported: depression	0.258	0.169	0.127	0.019
Non-cancer illness code_ self-reported: anxiety/panic attacks	0.128	0.267	0.63	0.006
Non-cancer illness code_ self-reported: mania/bipolar disorder/manic depression	0.083	0.24	0.729	0.006
Non-cancer illness code_ self-reported: bone disorder	0.167	0.494	0.735	0.002
Non-cancer illness code_ self-reported: back problem	0.481	0.289	0.096	0.005
Non-cancer illness code_ self-reported: joint disorder	0.26	0.433	0.548	0.002
Non-cancer illness code_ self-reported: osteoporosis	-0.089	0.182	0.623	0.014
Non-cancer illness code_ self-reported: ankylosing spondylitis	0.871	0.755	0.248	0.001
Non-cancer illness code_ self-reported: iron deficiency anaemia	-0.164	0.278	0.556	0.004
Non-cancer illness code_ self-reported: pernicious anaemia	0.168	0.361	0.642	0.003
Non-cancer illness code_ self-reported: uterine fibroids	0.273	0.26	0.294	0.006
Non-cancer illness code_ self-reported: vaginal prolapse/uterine prolapse	0.212	0.281	0.451	0.005
Non-cancer illness code_ self-reported: allergy or anaphylactic reaction to drug	0.235	0.441	0.595	0.002
Non-cancer illness code_ self-reported: hayfever/allergic rhinitis	0.111	0.133	0.403	0.024
Non-cancer illness code_ self-reported: enlarged prostate	-0.406	0.313	0.195	0.006
Non-cancer illness code_ self-reported: muscle or soft tissue injuries	10225	0.675	0.13	0.002
Non-cancer illness code_ self-reported: nasal polyps	-0.057	0.269	0.831	0.005
Non-cancer illness code_ self-reported: hypopituitarism	-0.81	0.833	0.331	0.001
Non-cancer illness code_ self-reported: eczema/dermatitis	0.172	0.216	0.426	0.008
Non-cancer illness code_ self-reported: psoriasis	-0.151	0.245	0.539	0.007
Non-cancer illness code_ self-reported: malabsorption/coeliac disease	-0.331	0.269	0.219	0.017
Non-cancer illness code_ self-reported: diverticular disease/diverticulitis	0.147	0.173	0.395	0.013
Non-cancer illness code_ self-reported: crohns disease	0.044	0.245	0.856	0.006
Non-cancer illness code_ self-reported: ulcerative colitis	0.201	0.295	0.497	0.005
Non-cancer illness code_ self-reported: rheumatoid arthritis	0.198	0.26	0.446	0.005
Non-cancer illness code_ self-reported: osteoarthritis	0.207	0.155	0.183	0.018
Non-cancer illness code_ self-reported: gout	0.083	0.115	0.471	0.026
Non-cancer illness code_ self-reported: high cholesterol	0.109	0.127	0.39	0.04
Non-cancer illness code_ self-reported: hiatus hernia	0.518	0.257	0.044	0.008
Non-cancer illness code_ self-reported: varicose veins	0.038	0.255	0.882	0.005
Non-cancer illness code_ self-reported: pneumothorax	0.433	0.342	0.206	0.003
Non-cancer illness code_ self-reported: polio / poliomyelitis	-0.649	0.56	0.247	0.002
Non-cancer illness code_ self-reported: arthritis (nos)	0.862	0.537	0.108	0.002
Non-cancer illness code_ self-reported: hypertrophic cardiomyopathy (hcm / hocm)	0.692	15058	0.646	0.001
Non-cancer illness code_ self-reported: vitiligo	0.205	0.5	0.683	0.002
Treatment/medication code: lisinopril	NA	NA	NA	NA
Treatment/medication code: ramipril	NA	NA	NA	NA
Treatment/medication code: isosorbide mononitrate	NA	NA	NA	NA
Treatment/medication code: isosorbide dinitrate	NA	NA	NA	NA
Treatment/medication code: tranexamic acid	NA	NA	NA	NA
Treatment/medication code: simvastatin	NA	NA	NA	NA
Treatment/medication code: ventolin 100micrograms inhaler	NA	NA	NA	NA
Treatment/medication code: atrovent 20micrograms inhaler	NA	NA	NA	NA
Treatment/medication code: becotide 50 inhaler	NA	NA	NA	NA
Treatment/medication code: kapake tablet	NA	NA	NA	NA
Treatment/medication code: lansoprazole	NA	NA	NA	NA
Treatment/medication code: lisinopril+hydrochlorothiazide 10mg/12,5mg tablet	NA	NA	NA	NA
Treatment/medication code: tramadol	NA	NA	NA	NA
Treatment/medication code: omeprazole	NA	NA	NA	NA
Treatment/medication code: senna	NA	NA	NA	NA
Treatment/medication code: atenolol	NA	NA	NA	NA
Treatment/medication code: aspirin	NA	NA	NA	NA
Treatment/medication code: logynon tablet	NA	NA	NA	NA
Treatment/medication code: hydroxocobalamin product	NA	NA	NA	NA
Treatment/medication code: vitamin b12 preparation	NA	NA	NA	NA
Treatment/medication code: ibuprofen	NA	NA	NA	NA
Treatment/medication code: morphine	NA	NA	NA	NA
Treatment/medication code: quinine	NA	NA	NA	NA
Treatment/medication code: gliclazide	NA	NA	NA	NA
Treatment/medication code: carbimazole	NA	NA	NA	NA
Treatment/medication code: prednisolone	NA	NA	NA	NA
Treatment/medication code: allopurinol	NA	NA	NA	NA
Treatment/medication code: beconase 50micrograms nasal spray	NA	NA	NA	NA
Treatment/medication code: rhinocort 50micrograms nasal spray	NA	NA	NA	NA
Treatment/medication code: ranitidine	NA	NA	NA	NA
Treatment/medication code: amitriptyline	NA	NA	NA	NA
Treatment/medication code: dothiepin	NA	NA	NA	NA
Treatment/medication code: bisoprolol	NA	NA	NA	NA
Treatment/medication code: doxazosin	NA	NA	NA	NA
Treatment/medication code: amlodipine	NA	NA	NA	NA
Treatment/medication code: salbutamol	NA	NA	NA	NA
Treatment/medication code: eumovate cream	NA	NA	NA	NA
Treatment/medication code: insulin product	NA	NA	NA	NA
Treatment/medication code: cetirizine	NA	NA	NA	NA
Treatment/medication code: codeine	NA	NA	NA	NA
Treatment/medication code: diclofenac	NA	NA	NA	NA
Treatment/medication code: liothyronine	NA	NA	NA	NA
Treatment/medication code: thyroxine product	NA	NA	NA	NA
Treatment/medication code: metformin	NA	NA	NA	NA
Treatment/medication code: warfarin	NA	NA	NA	NA
Treatment/medication code: enalapril	NA	NA	NA	NA
Treatment/medication code: perindopril	NA	NA	NA	NA
Treatment/medication code: flecainide	NA	NA	NA	NA
Treatment/medication code: furosemide	NA	NA	NA	NA
Treatment/medication code: nicorandil	NA	NA	NA	NA
Treatment/medication code: flax oil tablet	NA	NA	NA	NA
Treatment/medication code: venlafaxine	NA	NA	NA	NA
Treatment/medication code: losartan	NA	NA	NA	NA
Treatment/medication code: evening primrose oil	NA	NA	NA	NA
Treatment/medication code: citalopram	NA	NA	NA	NA
Treatment/medication code: alendronate sodium	NA	NA	NA	NA
Treatment/medication code: co-codamol	NA	NA	NA	NA
Treatment/medication code: co-amilofruse	NA	NA	NA	NA
Treatment/medication code: letrozole	NA	NA	NA	NA
Treatment/medication code: xalatan 0,005% eye drops	NA	NA	NA	NA
Treatment/medication code: atorvastatin	NA	NA	NA	NA
Treatment/medication code: candesartan cilexetil	NA	NA	NA	NA
Treatment/medication code: salmeterol product	NA	NA	NA	NA
Treatment/medication code: adcal-d3 1,5g/10micrograms chewable tablet	NA	NA	NA	NA
Treatment/medication code: clopidogrel	NA	NA	NA	NA
Treatment/medication code: indivina 1mg/2,5mg tablet	NA	NA	NA	NA
Treatment/medication code: symbicort 100/6 turbohaler	NA	NA	NA	NA
Treatment/medication code: seretide 50 evohaler	NA	NA	NA	NA
Treatment/medication code: rosiglitazone	NA	NA	NA	NA
Treatment/medication code: arcoxia 90mg tablet	NA	NA	NA	NA
Treatment/medication code: omacor 1g capsule	NA	NA	NA	NA
Treatment/medication code: spiriva 18micrograms inhalation capsule	NA	NA	NA	NA
Treatment/medication code: glucosamine product	NA	NA	NA	NA
Treatment/medication code: cipralex 5mg tablet	NA	NA	NA	NA
Treatment/medication code: levothyroxine sodium	NA	NA	NA	NA
Treatment/medication code: ezetimibe	NA	NA	NA	NA
Treatment/medication code: testogel 50mg gel 5g sachet	NA	NA	NA	NA
Treatment/medication code: bendroflumethiazide	NA	NA	NA	NA
Treatment/medication code: paracetamol	NA	NA	NA	NA
Illnesses of father: Heart disease	-0.113	0.139	0.416	0.03
Illnesses of father: None of the above (group 1)	0.057	0.194	0.767	0.015
Illnesses of father: None of the above (group 2)	-0.381	0.236	0.106	0.009
Illnesses of father: Prostate cancer	-0.03	0.254	0.906	0.008
Illnesses of father: Lung cancer	0.287	0.177	0.104	0.015
Illnesses of father: Chronic bronchitis/emphysema	0.261	0.178	0.142	0.015
Illnesses of father: High blood pressure	0.093	0.162	0.564	0.02
Illnesses of father: Diabetes	0.255	0.164	0.119	0.018
Illnesses of mother: Heart disease	-0.142	0.164	0.387	0.015
Illnesses of mother: Alzheimers disease/dementia	-0.127	0.497	0.799	0.002
Illnesses of mother: None of the above (group 1)	-0.069	0.177	0.698	0.016
Illnesses of mother: None of the above (group 2)	-0.226	0.214	0.292	0.01
Illnesses of mother: Breast cancer	0.476	0.246	0.053	0.009
Illnesses of mother: Chronic bronchitis/emphysema	0.302	0.188	0.108	0.011
Illnesses of mother: High blood pressure	-0.017	0.13	0.896	0.029
Illnesses of mother: Diabetes	0.296	0.17	0.083	0.019
Illnesses of siblings: Heart disease	0.501	0.208	0.016	0.016
Illnesses of siblings: None of the above (group 1)	-0.33	0.165	0.045	0.035
Illnesses of siblings: None of the above (group 2)	-0.359	0.233	0.124	0.01
Illnesses of siblings: Severe depression	0.38	0.206	0.064	0.014
Illnesses of siblings: Stroke	10675	0.537	0.047	0.003
Illnesses of siblings: High blood pressure	0.161	0.142	0.257	0.036
Illnesses of siblings: Diabetes	0.239	0.175	0.172	0.022
Smoking status: Previous	0.283	0.131	0.03	0.053
Smoking status: Current	0.556	0.164	0.001	0.053
Alcohol drinker status: Never	0.306	0.177	0.085	0.015
Alcohol drinker status: Previous	0.258	0.197	0.191	0.013
Home area population density - urban or rural: Scotland - Large Urban Area	-0.27	0.256	0.291	0.01
Home area population density - urban or rural: England/Wales - Village - less sparse	0.131	0.4	0.743	0.002
Hearing difficulty/problems: Yes	0.408	0.154	0.008	0.043
Tobacco smoking: Ex-smoker	0.167	0.149	0.261	0.078
Hair/balding pattern: Pattern 2	-0.215	0.148	0.144	0.051
Hair/balding pattern: Pattern 3	0.096	0.157	0.542	0.055
Hair/balding pattern: Pattern 4	0.008	0.106	0.939	0.161
Reason for reducing amount of alcohol drunk: Health precaution	-0.183	0.164	0.264	0.048
Type of tobacco previously smoked: Cigars or pipes	-0.176	0.385	0.647	0.01
Underlying (primary) cause of death: ICD10: E85,4 Organ-limited amyloidosis	NA	NA	NA	NA
Underlying (primary) cause of death: ICD10: J84,1 Other interstitial pulmonary diseases with fibrosis	-0.163	0.396	0.681	0.097
Tinnitus: Yes_ now most or all of the time	0.126	0.188	0.501	0.032
Tinnitus: Yes_ now some of the time	0.386	0.441	0.381	0.008
Tinnitus: Yes_ but not now_ but have in the past	0.444	0.27	0.1	0.017
Qualifications: College or University degree	-0.349	0.113	0.002	0.17
Qualifications: None of the above	0.39	0.131	0.003	0.098
Qualifications: A levels/AS levels or equivalent	-0.418	0.133	0.002	0.096
Qualifications: O levels/GCSEs or equivalent	-0.364	0.138	0.008	0.049
Qualifications: CSEs or equivalent	0.314	0.155	0.043	0.021
Qualifications: NVQ or HND or HNC or equivalent	0.523	0.215	0.015	0.014
Qualifications: Other professional qualifications eg: nursing_ teaching	-0.146	0.12	0.226	0.046
Current employment status: In paid employment or self-employed	-0.313	0.218	0.15	0.007
Current employment status: Retired	0.037	0.234	0.875	0.007
Current employment status: Looking after home and/or family	-0.109	0.238	0.646	0.006
Current employment status: Unable to work because of sickness or disability	0.42	0.172	0.015	0.025
Current employment status: Doing unpaid or voluntary work	-0.416	0.248	0.094	0.009
Transport type for commuting to job workplace: Car/motor vehicle	0.236	0.186	0.204	0.025
Transport type for commuting to job workplace: Walk	0.129	0.207	0.533	0.016
Transport type for commuting to job workplace: Public transport	-0.358	0.186	0.055	0.033
Transport type for commuting to job workplace: Cycle	-0.445	0.181	0.014	0.03
Illness_ injury_ bereavement_ stress in last 2 years: Serious illness_ injury or assault to yourself	0.655	0.211	0.002	0.013
Illness_ injury_ bereavement_ stress in last 2 years: None of the above	-0.437	0.165	0.008	0.023
Illness_ injury_ bereavement_ stress in last 2 years: Serious illness_ injury or assault of a close relative	0.068	0.222	0.758	0.011
Illness_ injury_ bereavement_ stress in last 2 years: Death of a close relative	0.267	0.262	0.309	0.006
Illness_ injury_ bereavement_ stress in last 2 years: Marital separation/divorce	0.697	0.327	0.033	0.005
Illness_ injury_ bereavement_ stress in last 2 years: Financial difficulties	0.58	0.183	0.002	0.033
Reason for glasses/contact lenses: For short-sightedness_ i,e, only or mainly for distance viewing	-0.352	0.154	0.023	0.025
Reason for glasses/contact lenses: For long-sightedness_ i,e, for near tasks like reading	0.312	0.218	0.153	0.009
Reason for glasses/contact lenses: For just reading/near work as you are getting older	0.632	0.398	0.112	0.004
Reason for glasses/contact lenses: For astigmatism	-0.277	0.221	0.212	0.009
Eye problems/disorders: Diabetes related eye disease	0.096	0.212	0.649	0.021
Eye problems/disorders: Glaucoma	-0.01	0.179	0.954	0.038
Eye problems/disorders: Injury or trauma resulting in loss of vision	NA	NA	NA	NA
Eye problems/disorders: Cataract	-0.161	0.251	0.521	0.021
Mouth/teeth dental problems: Mouth ulcers	-0.097	0.12	0.419	0.029
Mouth/teeth dental problems: None of the above	-0.43	0.157	0.006	0.036
Mouth/teeth dental problems: Painful gums	0.4	0.253	0.114	0.007
Mouth/teeth dental problems: Bleeding gums	0.151	0.151	0.315	0.022
Mouth/teeth dental problems: Loose teeth	0.613	0.201	0.002	0.015
Mouth/teeth dental problems: Toothache	0.351	0.239	0.142	0.008
Mouth/teeth dental problems: Dentures	0.42	0.144	0.004	0.048
Vascular/heart problems diagnosed by doctor: Heart attack	0.192	0.143	0.18	0.019
Vascular/heart problems diagnosed by doctor: None of the above	-0.137	0.091	0.134	0.113
Vascular/heart problems diagnosed by doctor: Angina	0.256	0.151	0.09	0.021
Vascular/heart problems diagnosed by doctor: High blood pressure	0.101	0.092	0.269	0.116
Fractured bone site(s): Ankle	0.219	0.239	0.358	0.007
Fractured bone site(s): Wrist	-0.064	0.22	0.77	0.007
Fractured bone site(s): Arm	-0.185	0.299	0.537	0.005
Fractured bone site(s): Other bones	0.108	0.215	0.614	0.009
Blood clot_ DVT_ bronchitis_ emphysema_ asthma_ rhinitis_ eczema_ allergy diagnosed by doctor: None of the above	-0.159	0.094	0.09	0.079
Blood clot_ DVT_ bronchitis_ emphysema_ asthma_ rhinitis_ eczema_ allergy diagnosed by doctor: Blood clot in the leg (DVT)	0.105	0.2	0.6	0.011
Blood clot_ DVT_ bronchitis_ emphysema_ asthma_ rhinitis_ eczema_ allergy diagnosed by doctor: Emphysema/chronic bronchitis	0.388	0.209	0.063	0.012
Blood clot_ DVT_ bronchitis_ emphysema_ asthma_ rhinitis_ eczema_ allergy diagnosed by doctor: Blood clot in the lung	0.219	0.243	0.369	0.006
Blood clot_ DVT_ bronchitis_ emphysema_ asthma_ rhinitis_ eczema_ allergy diagnosed by doctor: Asthma	0.197	0.109	0.07	0.06
Blood clot_ DVT_ bronchitis_ emphysema_ asthma_ rhinitis_ eczema_ allergy diagnosed by doctor: Hayfever_ allergic rhinitis or eczema	0.019	0.089	0.834	0.075
Medication for cholesterol_ blood pressure_ diabetes_ or take exogenous hormones: Cholesterol lowering medication	0.306	0.141	0.03	0.051
Medication for cholesterol_ blood pressure_ diabetes_ or take exogenous hormones: None of the above	-0.228	0.127	0.072	0.067
Medication for cholesterol_ blood pressure_ diabetes_ or take exogenous hormones: Blood pressure medication	0.021	0.109	0.844	0.104
Medication for cholesterol_ blood pressure_ diabetes_ or take exogenous hormones: Hormone replacement therapy	0.388	0.221	0.079	0.015
Medication for pain relief_ constipation_ heartburn: Aspirin	0.342	0.164	0.036	0.021
Medication for pain relief_ constipation_ heartburn: None of the above	-0.409	0.133	0.002	0.054
Medication for pain relief_ constipation_ heartburn: Ibuprofen (e,g, Nurofen)	0.405	0.157	0.01	0.023
Medication for pain relief_ constipation_ heartburn: Paracetamol	0.352	0.132	0.008	0.042
Medication for pain relief_ constipation_ heartburn: Omeprazole (e,g, Zanprol)	0.492	0.195	0.011	0.017
Medication for pain relief_ constipation_ heartburn: Laxatives (e,g, Dulcolax_ Senokot)	0.796	0.256	0.002	0.011
Vitamin and mineral supplements: Vitamin A	0.587	0.351	0.094	0.004
Vitamin and mineral supplements: None of the above	-0.075	0.143	0.598	0.029
Vitamin and mineral supplements: Vitamin B	0.452	0.282	0.109	0.007
Vitamin and mineral supplements: Vitamin C	-0.024	0.18	0.895	0.014
Vitamin and mineral supplements: Vitamin D	0.074	0.265	0.78	0.006
Vitamin and mineral supplements: Vitamin E	0.383	0.244	0.116	0.008
Vitamin and mineral supplements: Multivitamins +/- minerals	0.108	0.155	0.485	0.023
Why stopped smoking: None of the above	0.233	0.205	0.256	0.038
Why stopped smoking: Doctors advice	0.552	0.333	0.098	0.017
Why stopped smoking: Health precaution	-0.284	0.179	0.113	0.055
Why reduced smoking: Illness or ill health	0.221	0.435	0.612	0.08
Pain type(s) experienced in last month: Headache	0.278	0.125	0.026	0.045
Pain type(s) experienced in last month: None of the above	-0.459	0.139	0.001	0.055
Pain type(s) experienced in last month: Facial pain	0.586	0.267	0.028	0.006
Pain type(s) experienced in last month: Neck or shoulder pain	0.427	0.144	0.003	0.032
Pain type(s) experienced in last month: Back pain	0.441	0.161	0.006	0.04
Pain type(s) experienced in last month: Stomach or abdominal pain	0.37	0.153	0.016	0.021
Pain type(s) experienced in last month: Hip pain	0.388	0.163	0.017	0.023
Pain type(s) experienced in last month: Knee pain	0.414	0.145	0.004	0.042
Pain type(s) experienced in last month: Pain all over the body	0.59	0.226	0.009	0.01
Types of transport used (excluding work): Car/motor vehicle	-0.13	0.146	0.373	0.024
Types of transport used (excluding work): Walk	-0.148	0.132	0.264	0.033
Types of transport used (excluding work): Public transport	-0.1	0.154	0.518	0.022
Types of transport used (excluding work): Cycle	-0.281	0.152	0.065	0.026
Types of physical activity in last 4 weeks: Walking for pleasure (not as a means of transport)	-0.504	0.152	0.001	0.035
Types of physical activity in last 4 weeks: None of the above	0.423	0.162	0.009	0.023
Types of physical activity in last 4 weeks: Other exercises (eg: swimming_ cycling_ keep fit_ bowling)	-0.198	0.114	0.083	0.046
Types of physical activity in last 4 weeks: Strenuous sports	-0.142	0.132	0.281	0.022
Types of physical activity in last 4 weeks: Light DIY (eg: pruning_ watering the lawn)	-0.289	0.127	0.023	0.039
Types of physical activity in last 4 weeks: Heavy DIY (eg: weeding_ lawn mowing_ carpentry_ digging)	-0.195	0.137	0.155	0.033
Medication for cholesterol_ blood pressure or diabetes: Cholesterol lowering medication	0.098	0.123	0.426	0.069
Medication for cholesterol_ blood pressure or diabetes: None of the above	-0.119	0.119	0.318	0.087
Medication for cholesterol_ blood pressure or diabetes: Blood pressure medication	0.132	0.118	0.263	0.103
Medication for cholesterol_ blood pressure or diabetes: Insulin	-0.012	0.273	0.964	0.012
Mineral and other dietary supplements: Fish oil (including cod liver oil)	0.141	0.152	0.353	0.027
Mineral and other dietary supplements: None of the above	0.045	0.135	0.739	0.03
Mineral and other dietary supplements: Glucosamine	-0.102	0.145	0.48	0.025
Mineral and other dietary supplements: Calcium	0.032	0.165	0.847	0.013
Mineral and other dietary supplements: Zinc	0.378	0.223	0.09	0.012
Mineral and other dietary supplements: Selenium	0.299	0.252	0.234	0.007
Diagnoses - main ICD10: B37 Candidiasis	0.542	16075	0.736	0.001
Diagnoses - main ICD10: C44 Other malignant neoplasms of skin	-0.033	0.196	0.867	0.011
Diagnoses - main ICD10: C50 Malignant neoplasm of breast	-0.126	0.204	0.538	0.009
Diagnoses - main ICD10: C61 Malignant neoplasm of prostate	-0.158	0.291	0.586	0.005
Diagnoses - main ICD10: D12 Benign neoplasm of colon_ rectum_ anus and anal canal	0.23	0.25	0.358	0.008
Diagnoses - main ICD10: D25 Leiomyoma of uterus	-0.073	0.244	0.764	0.005
Diagnoses - main ICD10: E03 Other hypothyroidism	NA	NA	NA	NA
Diagnoses - main ICD10: E04 Other non-toxic goitre	-0.293	0.291	0.313	0.005
Diagnoses - main ICD10: F31 Bipolar affective disorder	0.284	0.271	0.294	0.006
Diagnoses - main ICD10: F43 Reaction to severe stress_ and adjustment disorders	NA	NA	NA	NA
Diagnoses - main ICD10: G47 Sleep disorders	-0.132	0.253	0.602	0.007
Diagnoses - main ICD10: G56 Mononeuropathies of upper limb	0.405	0.205	0.048	0.014
Diagnoses - main ICD10: H25 Senile cataract	-0.343	0.369	0.353	0.003
Diagnoses - main ICD10: H26 Other cataract	0.426	0.214	0.046	0.009
Diagnoses - main ICD10: I10 Essential (primary) hypertension	0.422	0.499	0.398	0.002
Diagnoses - main ICD10: I20 Angina pectoris	0.229	0.244	0.347	0.009
Diagnoses - main ICD10: I21 Acute myocardial infarction	0.237	0.195	0.226	0.01
Diagnoses - main ICD10: I25 Chronic ischaemic heart disease	0.167	0.153	0.275	0.02
Diagnoses - main ICD10: I30 Acute pericarditis	0.388	0.498	0.436	0.002
Diagnoses - main ICD10: I48 Atrial fibrillation and flutter	0.189	0.184	0.305	0.012
Diagnoses - main ICD10: I80 Phlebitis and thrombophlebitis	-0.124	0.204	0.544	0.009
Diagnoses - main ICD10: I83 Varicose veins of lower extremities	0.095	0.166	0.568	0.019
Diagnoses - main ICD10: I84 Haemorrhoids	0.365	0.231	0.114	0.01
Diagnoses - main ICD10: J22 Unspecified acute lower respiratory infection	0.47	0.385	0.221	0.003
Diagnoses - main ICD10: J33 Nasal polyp	0.184	0.289	0.525	0.004
Diagnoses - main ICD10: J34 Other disorders of nose and nasal sinuses	0.634	0.468	0.175	0.002
Diagnoses - main ICD10: J44 Other chronic obstructive pulmonary disease	0.414	0.298	0.165	0.005
Diagnoses - main ICD10: K20 Oesophagitis	0.522	0.392	0.183	0.003
Diagnoses - main ICD10: K21 Gastro-oesophageal reflux disease	0.429	0.25	0.086	0.006
Diagnoses - main ICD10: K22 Other diseases of oesophagus	0.34	0.328	0.299	0.004
Diagnoses - main ICD10: K29 Gastritis and duodenitis	0.244	0.22	0.267	0.008
Diagnoses - main ICD10: K30 Dyspepsia	0.487	0.39	0.212	0.003
Diagnoses - main ICD10: K35 Acute appendicitis	0.34	0.396	0.391	0.003
Diagnoses - main ICD10: K40 Inguinal hernia	0.135	0.143	0.345	0.019
Diagnoses - main ICD10: K43 Ventral hernia	-0.081	0.32	0.801	0.004
Diagnoses - main ICD10: K44 Diaphragmatic hernia	0.546	0.308	0.076	0.005
Diagnoses - main ICD10: K50 Crohns disease [regional enteritis]	-0.078	0.27	0.773	0.005
Diagnoses - main ICD10: K51 Ulcerative colitis	0.003	0.294	0.992	0.005
Diagnoses - main ICD10: K52 Other non-infective gastro-enteritis and colitis	0.491	0.308	0.111	0.005
Diagnoses - main ICD10: K57 Diverticular disease of intestine	0.243	0.191	0.203	0.014
Diagnoses - main ICD10: K60 Fissure and fistula of anal and rectal regions	-0.049	0.265	0.855	0.006
Diagnoses - main ICD10: K62 Other diseases of anus and rectum	0.6	0.296	0.043	0.005
Diagnoses - main ICD10: K76 Other diseases of liver	0.043	0.311	0.89	0.004
Diagnoses - main ICD10: K80 Cholelithiasis	0.286	0.225	0.203	0.009
Diagnoses - main ICD10: L03 Cellulitis	0.244	0.334	0.466	0.004
Diagnoses - main ICD10: M10 Gout	-0.426	0.433	0.326	0.002
Diagnoses - main ICD10: M16 Coxarthrosis [arthrosis of hip]	-0.209	0.189	0.267	0.011
Diagnoses - main ICD10: M17 Gonarthrosis [arthrosis of knee]	0.244	0.164	0.137	0.015
Diagnoses - main ICD10: M20 Acquired deformities of fingers and toes	0.229	0.184	0.214	0.011
Diagnoses - main ICD10: M21 Other acquired deformities of limbs	NA	NA	NA	NA
Diagnoses - main ICD10: M23 Internal derangement of knee	0.539	0.272	0.047	0.008
Diagnoses - main ICD10: M24 Other specific joint derangements	0.485	0.349	0.165	0.004
Diagnoses - main ICD10: M25 Other joint disorders_ not elsewhere classified	NA	NA	NA	NA
Diagnoses - main ICD10: M54 Dorsalgia	0.287	0.202	0.155	0.011
Diagnoses - main ICD10: M67 Other disorders of synovium and tendon	0.274	0.421	0.515	0.002
Diagnoses - main ICD10: M70 Soft tissue disorders related to use_ overuse and pressure	0.287	0.302	0.342	0.004
Diagnoses - main ICD10: M72 Fibroblastic disorders	0.097	0.174	0.578	0.013
Diagnoses - main ICD10: N19 Unspecified renal failure	-0.163	0.361	0.652	0.003
Diagnoses - main ICD10: N20 Calculus of kidney and ureter	0.242	0.25	0.333	0.007
Diagnoses - main ICD10: N32 Other disorders of bladder	-0.39	0.357	0.275	0.004
Diagnoses - main ICD10: N40 Hyperplasia of prostate	-0.444	0.292	0.128	0.005
Diagnoses - main ICD10: N81 Female genital prolapse	0.069	0.298	0.818	0.006
Diagnoses - main ICD10: N92 Excessive_ frequent and irregular menstruation	0.289	0.235	0.219	0.007
Diagnoses - main ICD10: O75 Other complications of labour and delivery_ not elsewhere classified	-0.534	0.46	0.245	0.002
Diagnoses - main ICD10: R04 Haemorrhage from respiratory passages	0.068	0.406	0.867	0.002
Diagnoses - main ICD10: R07 Pain in throat and chest	0.545	0.187	0.004	0.016
Diagnoses - main ICD10: R10 Abdominal and pelvic pain	0.639	0.219	0.004	0.012
Diagnoses - main ICD10: R11 Nausea and vomiting	NA	NA	NA	NA
Diagnoses - main ICD10: R14 Flatulence and related conditions	-0.001	0.335	0.997	0.003
Diagnoses - main ICD10: R31 Unspecified haematuria	0.839	0.448	0.061	0.003
Diagnoses - main ICD10: R35 Polyuria	-0.482	0.426	0.259	0.003
Diagnoses - main ICD10: R55 Syncope and collapse	0.126	0.301	0.675	0.006
Diagnoses - main ICD10: R69 Unknown and unspecified causes of morbidity	0.42	0.271	0.122	0.005
Diagnoses - main ICD10: S09 Other and unspecified injuries of head	0.204	0.284	0.474	0.004
Diagnoses - main ICD10: S52 Fracture of forearm	-0.277	0.255	0.276	0.007
Diagnoses - main ICD10: S66 Injury of muscle and tendon at wrist and hand level	-0.744	0.609	0.222	0.001
Diagnoses - main ICD10: S76 Injury of muscle and tendon at hip and thigh level	0.033	0.648	0.96	0.001
Diagnoses - main ICD10: T84 Complications of internal orthopaedic prosthetic devices_ implants and grafts	0.345	0.328	0.293	0.005
Diagnoses - main ICD10: Z09 Follow-up examination after treatment for conditions other than malignant neoplasms	-0.225	0.332	0.499	0.004
Diagnoses - main ICD10: Z47 Other orthopaedic follow-up care	0.024	0.314	0.939	0.003
Diagnoses - main ICD10: Z80 Family history of malignant neoplasm	0.8	0.931	0.39	0.001
